# Supplementary material for: Effect of goal-directed mobilisation intervention compared with standard care on physical activity among medical inpatients: protocol for the GoMob-in randomised controlled trial
Source: HighWire-hosted journal article supplement (doi:10.1136/bmjopen-2021-058509), 2022-05-01
Supplement: bmjopen-2021-058509supp002_data_supplement.pdf [file bmjopen-2021-058509supp002_data_supplement.pdf]

| <b>Tages-Ziel</b><br>(mindestens 3 x/Tag) |                                                                   |
|-------------------------------------------|-------------------------------------------------------------------|
| <b>Stufe</b>                              |                                                                   |
| <b>8</b>                                  | <b>≥ 75 m gehen (30 min oder Treppe)<br/>&amp; keine Bettruhe</b> |
| <b>7</b>                                  | <b>≥ 75 m gehen</b>                                               |
| <b>6</b>                                  | <b>≥ 7,5 m gehen</b>                                              |
| <b>5</b>                                  | <b>≥ 10 Schritte gehen</b>                                        |
| <b>4</b>                                  | <b>≥ 1 Minute stehen</b>                                          |
| <b>3</b>                                  | <b>Transfer auf den Stuhl /<br/>Nachtstuhl</b>                    |
| <b>2</b>                                  | <b>An die Bettkante sitzen</b>                                    |
| <b>1</b>                                  | <b>Aktivitäten im Bett /<br/>unselbständiger Transfer</b>         |

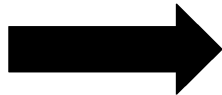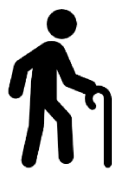

mit Gehstock

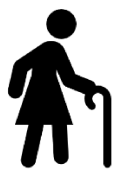

mit Gehstock

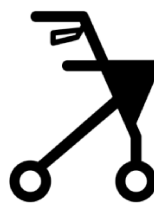

mit Rollator

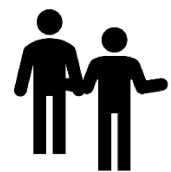

in Begleitung
